# Supplementary material
Source: MDPI journal article supplement (https://www.mdpi.com/1999-4907/12/6/736)
Supplement: s1 [file s1]

# Supporting material – Tabulated values of Figures 4–18.

**Table S1** Values for **Figure 4**. Extractives groups in spruce bark hexane extract (amount, mg/g of dry bark)

| Compounds      | Winter storage |            |             |            | Summer storage |            |            |            |
|----------------|----------------|------------|-------------|------------|----------------|------------|------------|------------|
|                | zero-sample    | 4 weeks    | 12 weeks    | 24 weeks   | zero-sample    | 4 weeks    | 12 weeks   | 24 weeks   |
| Unidentified   | 29.3 ± 0.5     | 13.9 ± 0.3 | 29.7 ± 0.2  | 20.7 ± 0.1 | 18.7 ± 0.2     | 22.3 ± 0.4 | 18.2 ± 0.2 | 36.8 ± 0.2 |
| Resin Acids    | 12.1 ± 0.1     | 6.0 ± 0.1  | 11.4 ± 0.04 | 9.7 ± 2.2  | 12.7 ± 0.4     | 7.7 ± 0.4  | 10.5 ± 0.2 | 12.2 ± 0.3 |
| Fatty Acids    | 9.2 ± 0.7      | 7.5 ± 0.8  | 10.1 ± 0.1  | 6.4 ± 3.4  | 10.9 ± 0.2     | 5.5 ± 0.3  | 5.3 ± 0.1  | 4.3 ± 0.1  |
| Triglycerides  | 4.7 ± 0.1      | 5.2 ± 0.06 | 5.8 ± 0.003 | 0.6 ± 0.1  | 9.4 ± 0.4      | 3.9 ± 0.5  | 3.6 ± 0.1  | 3.3 ± 0.1  |
| Steryl Esters  | 1.9 ± 0.1      | 2.3 ± 0.7  | 2.9 ± 0.1   | 1.7 ± 0.1  | 3.4 ± 0.1      | 4.2 ± 0.3  | 3.7 ± 0.2  | 4.0 ± 0.2  |
| Sterols        | 2.4 ± 0.04     | 2.9 ± 0.9  | 3.5 ± 0.1   | 2.4 ± 0.1  | 4.2 ± 0.1      | 4.8 ± 0.5  | 4.4 ± 0.03 | 4.8 ± 0.2  |
| Fatty Alcohols | 1.7 ± 0.02     | 0.6 ± 0.06 | 0.8 ± 0.04  | 0.9 ± 0.1  | 1.1 ± 0.02     | 0.9 ± 0.1  | 0.7 ± 0.01 | 1.1 ± 0.04 |
| Diterpenoids   | 2.8 ± 0.1      | 1.8 ± 0.06 | 3.2 ± 0.01  | 2.2 ± 0.8  | 5.7 ± 0.04     | 1.8 ± 0.2  | 3.4 ± 0.1  | 3.7 ± 0.06 |
| Other          | 2.7 ± 0.6      | 1.0 ± 0.4  | 2.6 ± 0.2   | 2.5 ± 0.2  | 3.0 ± 0.9      | 2.0 ± 0.5  | 2.6 ± 0.1  | 4.7 ± 0.2  |

**Table S2** Values for **Figure 5**. Extractives groups in spruce bark water extract (amount, mg/g of dry bark)

| Compounds       | Winter Storage |              |             |              | Summer Storage |             |             |            |
|-----------------|----------------|--------------|-------------|--------------|----------------|-------------|-------------|------------|
|                 | zero-sample    | 4 weeks      | 12 weeks    | 24 weeks     | zero-sample    | 4 weeks     | 12 weeks    | 24 weeks   |
| Unidentified    | 140.9 ± 1.6    | 159.2 ± 19.7 | 198.3 ± 0.8 | 136.8 ± 0.04 | 155.6 ± 13.1   | 158.0 ± 1.3 | 143.4 ± 2.9 | 68.7 ± 0.1 |
| Sugars          | 66.9 ± 0.03    | 47.8 ± 10.6  | 30.0 ± 2.6  | 6.1 ± 0.7    | 42.1 ± 2.5     | 23.1 ± 1.9  | 4.8 ± 0.6   | 7.1 ± 0.5  |
| Stilbenes       | 23.5 ± 0.03    | 17.1 ± 2.9   | 6.1 ± 0.1   | 1.3 ± 0.3    | 9.9 ± 2.0      | 6.7 ± 0.2   | 1.4 ± 0.2   | 0.7 ± 0.08 |
| Organic Acids   | 22.4 ± 0.7     | 21.9 ± 5.0   | 17.1 ± 0.6  | 2.2 ± 0.2    | 40.0 ± 3.8     | 26.7 ± 2.6  | 6.2 ± 0.1   | 16.7 ± 0.4 |
| Alcohols        | 11.1 ± 0.2     | 10.9 ± 2.3   | 10.0 ± 0.2  | 3.1 ± 0.4    | 12.6 ± 1.4     | 8.3 ± 0.4   | 2.0 ± 0.1   | 2.4 ± 0.3  |
| Sesquistilbenes | 10.8 ± 0.7     | 15.4 ± 2.5   | 17.3 ± 2.6  | 8.8 ± 0.9    | 8.2 ± 1.9      | 9.5 ± 0.9   | 5.9 ± 0.3   | 6.3 ± 0.6  |
| Distilbenes     | 10.1 ± 0.5     | 14.7 ± 0.9   | 15.2 ± 0.4  | 7.4 ± 0.3    | 13.7 ± 4.4     | 15.0 ± 1.1  | 9.5 ± 1.9   | 5.4 ± 0.2  |
| Flavonoids      | 4.6 ± 0.5      | 4.9 ± 1.4    | 3.2 ± 0.1   | 1.0 ± 0.01   | 5.1 ± 0.8      | 3.2 ± 0.003 | 1.2 ± 0.03  | 1.5 ± 0.2  |
| Others          | 8.4 ± 0.3      | 18.0 ± 4.1   | 11.4 ± 0.7  | 9.4 ± 0.6    | 14.5 ± 3.7     | 8.6 ± 0.9   | 1.7 ± 0.1   | 4.0 ± 0.2  |

**Table S3** Values for **Figure 6**. Resin acids in spruce bark hexane extract (amount, mg/g of dry bark)

| Compounds                    | Winter Storage |             |              |             | Summer Storage |             |             |            |
|------------------------------|----------------|-------------|--------------|-------------|----------------|-------------|-------------|------------|
|                              | zero-sample    | 4 weeks     | 12 weeks     | 24 weeks    | zero-sample    | 4 weeks     | 12 weeks    | 24 weeks   |
| Hydroxy Resin Acid           | 0.2 ± 0.04     | 0.2 ± 0.02  | 0.4 ± 0.02   | 0.2 ± 0.001 | 0.3 ± 0.03     | 0.3 ± 0.04  | 0.2 ± 0.01  | 0.4 ± 0.04 |
| Pimaric Acid                 | 0.2 ± 0.1      | 0.1 ± 0.004 | 0.2 ± 0.001  | 0.2 ± 0.01  | 0.1 ± 0.003    | 0.2 ± 0.01  | 0.2 ± 0.004 | 0.3 ± 0.01 |
| Imbricatolic Acid            | 0.2 ± 0.01     | 0.2 ± 0.003 | 0.4 ± 0.02   | 0.2 ± 0.01  | 0.2 ± 0.001    | 0.2 ± 0.01  | 0.2 ± 0.01  | 0.5 ± 0.01 |
| Hydroxydehydroabietic Acid 2 | 0.3 ± 0.01     | 0.2 ± 0.03  | 0.4 ± 0.03   | 0.5 ± 0.1   | 0.4 ± 0.01     | 0.3 ± 0.04  | 0.2 ± 0.001 | 0.5 ± 0.02 |
| Sandaracopimaric Acid        | 0.4 ± 0.01     | 0.2 ± 0.002 | 0.4 ± 0.0001 | 0.4 ± 0.01  | 0.3 ± 0.003    | 0.3 ± 0.02  | 0.3 ± 0.01  | 0.4 ± 0.01 |
| Hydroxydehydroabietic Acid 1 | 0.5 ± 0.004    | 0.3 ± 0.1   | 0.4 ± 0.001  | 0.2 ± 0.1   | 0.4 ± 0.01     | 0.4 ± 0.001 | 0.3 ± 0.003 | 0.2 ± 0.01 |

|                        |            |            |            |            |            |            |            |            |
|------------------------|------------|------------|------------|------------|------------|------------|------------|------------|
| 4-Hydroxycinnamic Acid | 0.5 ± 0.03 | 0.4 ± 0.1  | 0.2 ± 0.02 | 0.2 ± 0.1  | 0.1 ± 0.4  | 0.2 ± 0.1  | 0.3 ± 0.01 | 0.2 ± 0.03 |
| Palustric Acid         | 1.0 ± 0.1  | 0.6 ± 0.1  | 1.1 ± 0.1  | 0.8 ± 0.01 | 1.0 ± 0.02 | 0.2 ± 0.1  | 1.2 ± 0.03 | 1.2 ± 0.1  |
| Neoabietic Acid        | 1.2 ± 0.2  | 0.9 ± 0.1  | 1.0 ± 0.03 | 0.8 ± 0.3  | 1.6 ± 0.1  | 0.3 ± 0.03 | 1.1 ± 0.02 | 0.9 ± 0.1  |
| Levopimaric Acid       | 1.3 ± 0.1  | 0.6 ± 0.1  | 1.1 ± 0.04 | 0.6 ± 0.4  | 1.3 ± 0.1  | 0.3 ± 0.04 | 1.2 ± 0.03 | 0.9 ± 0.1  |
| Abietic Acid           | 1.4 ± 0.2  | 0.7 ± 0.2  | 1.5 ± 0.01 | 1.2 ± 0.02 | 1.9 ± 0.2  | 0.8 ± 0.03 | 1.1 ± 0.04 | 1.0 ± 0.04 |
| Isopimaric Acid        | 1.7 ± 0.1  | 1.0 ± 0.03 | 2.0 ± 0.02 | 1.6 ± 0.5  | 1.9 ± 0.03 | 1.2 ± 0.1  | 1.5 ± 0.03 | 1.6 ± 0.03 |
| Dehydroabietic Acid    | 2.4 ± 0.1  | 1.2 ± 0.2  | 2.3 ± 0.02 | 2.3 ± 0.03 | 2.5 ± 0.1  | 2.5 ± 0.1  | 2.6 ± 0.1  | 3.2 ± 0.04 |

**Table S4** Values for Figure 7. Fatty acids in spruce bark hexane extract (amount, mg/g of dry bark)

| Compounds | Winter Storage |             |             |            | Summer Storage |             |             |             |
|-----------|----------------|-------------|-------------|------------|----------------|-------------|-------------|-------------|
|           | zero-sample    | 4 weeks     | 12 weeks    | 24 weeks   | zero-sample    | 4 weeks     | 12 weeks    | 24 weeks    |
| Acid 25:0 | 0.1 ± 0.01     | 0.1 ± 0.02  | 0.2 ± 0.02  | 0.1 ± 0.01 | 0.1 ± 0.001    | 0.1 ± 0.01  | 0.1 ± 0.001 | 0.2 ± 0.003 |
| Acid 17:0 | 0.2 ± 0.00003  | 0.2 ± 0.001 | 0.3 ± 0.002 | 0.2 ± 0.1  | 0.4 ± 0.003    | 0.2 ± 0.01  | 0.2 ± 0.001 | 0.1 ± 0.001 |
| Acid 18:0 | 0.1 ± 0.01     | 0.2 ± 0.01  | 0.3 ± 0.002 | 0.2 ± 0.1  | 0.3 ± 0.001    | 0.2 ± 0.01  | 0.3 ± 0.004 | 0.3 ± 0.002 |
| Acid 24:0 | 0.6 ± 0.1      | 0.1 ± 0.01  | 0.3 ± 0.01  | 0.4 ± 0.02 | 0.2 ± 0.02     | 0.3 ± 0.01  | 0.3 ± 0.003 | 0.4 ± 0.003 |
| Acid 20:0 | 0.4 ± 0.01     | 0.2 ± 0.01  | 1.6 ± 0.02  | 0.3 ± 0.01 | 0.2 ± 0.1      | 0.2 ± 0.002 | 0.3 ± 0.001 | 0.3 ± 0.003 |
| Acid 16:0 | 0.4 ± 0.001    | 0.4 ± 0.003 | 0.5 ± 0.001 | 0.4 ± 0.1  | 0.7 ± 0.002    | 0.3 ± 0.01  | 0.4 ± 0.003 | 0.2 ± 0.004 |
| Acid 22:0 | 0.9 ± 0.01     | 0.3 ± 0.002 | 0.6 ± 0.01  | 0.6 ± 0.01 | 0.5 ± 0.01     | 0.8 ± 0.01  | 0.5 ± 0.002 | 0.6 ± 0.01  |
| Acid 18:3 | 1.6 ± 0.02     | 1.6 ± 0.1   | 1.7 ± 0.02  | 1.0 ± 0.4  | 2.0 ± 0.01     | 0.8 ± 0.02  | 0.7 ± 0.01  | 0.4 ± 0.02  |
| Acid 18:2 | 2.1 ± 0.1      | 2.3 ± 0.4   | 2.4 ± 0.02  | 1.5 ± 1.2  | 3.2 ± 0.01     | 1.3 ± 0.04  | 1.2 ± 0.02  | 0.7 ± 0.1   |
| Acid 18:1 | 1.8 ± 0.03     | 2.0 ± 0.2   | 2.3 ± 0.1   | 1.6 ± 1.0  | 3.3 ± 0.1      | 1.1 ± 0.1   | 1.5 ± 0.03  | 0.9 ± 0.004 |

**Table S5** Values for Figure 8. Diterpenoids in spruce bark hexane extract (amount, mg/g of dry bark)

| Compounds              | Winter Storage |             |              |              | Summer Storage |              |              |              |
|------------------------|----------------|-------------|--------------|--------------|----------------|--------------|--------------|--------------|
|                        | zero-sample    | 4 weeks     | 12 weeks     | 24 weeks     | zero-sample    | 4 weeks      | 12 weeks     | 24 weeks     |
| Isopimaral             | 0.1 ± 0.003    | 0.1 ± 0.02  | 0.1 ± 0.002  | 0.1 ± 0.02   | 0.1 ± 0.001    | 0.1 ± 0.01   | 0.1 ± 0.002  | 0.1 ± 0.001  |
| Pimarol                | 0.3 ± 0.02     | 0.1 ± 0.01  | 0.1 ± 0.02   | 0.1 ± 0.03   | 0.3 ± 0.002    | 0.1 ± 0.01   | 0.1 ± 0.002  | 0.1 ± 0.0003 |
| Epimanoyl Oxide        | 0.1 ± 0.002    | 0.1 ± 0.01  | 0.1 ± 0.0001 | 0.1 ± 0.0001 | 0.1 ± 0.003    | 0.1 ± 0.002  | 0.1 ± 0.001  | 0.2 ± 0.002  |
| Isopimarol             | 0.1 ± 0.002    | 0.1 ± 0.04  | 0.2 ± 0.01   | 0.1 ± 0.04   | 0.2 ± 0.004    | 0.1 ± 0.002  | 0.1 ± 0.001  | 0.1 ± 0.002  |
| Cubebene               | 0.7 ± 0.01     | 0.6 ± 0.3   | 0.0 ± 0.0004 | 0.0 ± 0.003  | 0.0 ± 0.02     | 0.0 ± 0.0002 | 0.0 ± 0.0002 | 0.0 ± 0.006  |
| Dehydroabietal         | 0.1 ± 0.01     | 0.1 ± 0.004 | 0.2 ± 0.001  | 0.1 ± 0.1    | 0.2 ± 0.004    | 0.1 ± 0.01   | 0.2 ± 0.002  | 0.2 ± 0.002  |
| Palustral              | 0.2 ± 0.02     | 0.1 ± 0.04  | 0.3 ± 0.01   | 0.1 ± 0.001  | 0.2 ± 0.01     | 0.1 ± 0.01   | 0.2 ± 0.003  | 0.3 ± 0.01   |
| Cis-Abienol            | 0.5 ± 0.01     | 0.4 ± 0.04  | 0.4 ± 0.01   | 0.3 ± 0.2    | 0.5 ± 0.0002   | 0.2 ± 0.01   | 0.2 ± 0.01   | 0.2 ± 0.01   |
| Thunbergol             | 0.4 ± 0.1      | 0.6 ± 0.1   | 0.9 ± 0.01   | 0.1 ± 0.01   | 2.8 ± 0.03     | 0.6 ± 0.04   | 1.4 ± 0.04   | 0.2 ± 0.01   |
| Manool                 | 0.6 ± 0.1      | 0.2 ± 0.2   | 0.7 ± 0.1    | 0.5 ± 0.2    | 1.9 ± 0.4      | 0.4 ± 0.2    | 1.0 ± 0.1    | 0.7 ± 0.1    |
| Δ13-(trans-)Neoabienol | 0.9 ± 0.1      | 0.5 ± 0.1   | 1.0 ± 0.004  | 0.8 ± 0.3    | 1.0 ± 0.02     | 0.7 ± 0.02   | 0.9 ± 0.01   | 1.1 ± 0.001  |

**Table S6** Values for Figure 9. Sterols in spruce bark hexane extract (amount, mg/g of dry bark)

| Compounds | Winter Storage |         |          |          | Summer Storage |         |          |          |
|-----------|----------------|---------|----------|----------|----------------|---------|----------|----------|
|           | zero-          | 4 weeks | 12 weeks | 24 weeks | zero-          | 4 weeks | 12 weeks | 24 weeks |

|                              | sample      |            |              |              | sample       |              |             |              |
|------------------------------|-------------|------------|--------------|--------------|--------------|--------------|-------------|--------------|
| Acid 22:0 Monoglyceride      | 0.0 ± 0.001 | 0.0 ± 0.01 | 0.0 ± 0.004  | 0.0 ± 0.001  | 0.0          | 0.0          | 0.0         | 0.0          |
| Acid 18:2 Monoglyceride      | 0.2 ± 0.2   | 0.1 ± 0.01 | 0.0 ± 0.001  | 0.0 ± 0.0001 | 0.0 ± 0.0001 | 0.0 ± 0.0003 | 0.0 ± 0.001 | 0.1 ± 0.002  |
| 24-Methylenecycloartan-3-One | 0.0 ± 0.01  | 0.0 ± 0.01 | 0.0 ± 0.0003 | 0.1 ± 0.06   | 0.0 ± 0.01   | 0.0 ± 0.0002 | 0.0 ± 0.003 | 0.0 ± 0.0003 |
| Diglycerol                   | 1.3 ± 0.3   | 0.2 ± 0.07 | 0.0 ± 0.002  | 0.0 ± 0.004  | 0.0 ± 0.001  | 0.0 ± 0.03   | 0.0 ± 0.002 | 0.0 ± 0.001  |
| Campesterol                  | 0.4 ± 0.01  | 0.4 ± 0.1  | 0.4 ± 0.004  | 0.4 ± 0.03   | 0.4 ± 0.03   | 0.4 ± 0.02   | 0.4 ± 0.001 | 0.4 ± 0.02   |
| Sitosterol                   | 2.0 ± 0.03  | 1.8 ± 0.6  | 2.2 ± 0.03   | 1.9 ± 0.3    | 2.2 ± 0.1    | 2.0 ± 0.05   | 1.7 ± 0.001 | 1.9 ± 0.1    |

**Table S7** Values for **Figure 10**. Fatty alcohols in spruce bark hexane extract (amount, mg/g of dry bark)

| Compounds    | Winter Storage |             |             |            | Summer Storage |             |              |             |
|--------------|----------------|-------------|-------------|------------|----------------|-------------|--------------|-------------|
|              | zero-sample    | 4 weeks     | 12 weeks    | 24 weeks   | zero-sample    | 4 weeks     | 12 weeks     | 24 weeks    |
| Alcohol 15:0 | 0.3 ± 0.0001   | 0.1 ± 0.002 | 0.1 ± 0.003 | 0.1 ± 0.02 | 0.1 ± 0.003    | 0.1 ± 0.007 | 0.1 ± 0.001  | 0.1 ± 0.001 |
| Alcohol 18:0 | 0.3 ± 0.004    | 0.1 ± 0.01  | 0.1 ± 0.004 | 0.1 ± 0.01 | 0.4 ± 0.01     | 0.2 ± 0.02  | 0.2 ± 0.002  | 0.2 ± 0.001 |
| Alcohol 24:0 | 0.4 ± 0.01     | 0.1 ± 0.01  | 0.2 ± 0.01  | 0.2 ± 0.1  | 0.2 ± 0.01     | 0.2 ± 0.03  | 0.1 ± 0.01   | 0.3 ± 0.02  |
| Alcohol 22:0 | 0.7 ± 0.02     | 0.3 ± 0.1   | 0.4 ± 0.03  | 0.4 ± 0.1  | 0.4 ± 0.001    | 0.4 ± 0.02  | 0.3 ± 0.0002 | 0.5 ± 0.02  |

**Table S8** Values for **Figure 11**. Sugars in spruce bark water extract (amount, mg/g of dry bark)

| Compounds  | Winter Storage |            |             |             | Summer Storage |            |             |            |
|------------|----------------|------------|-------------|-------------|----------------|------------|-------------|------------|
|            | zero-sample    | 4 weeks    | 12 weeks    | 24 weeks    | zero-sample    | 4 weeks    | 12 weeks    | 24 weeks   |
| Other      | 0.7 ± 0.2      | 0.6 ± 0.1  | 0.8 ± 0.003 | 0.2 ± 0.01  | 1.2 ± 0.2      | 0.5 ± 0.4  | 0.8 ± 0.003 | 0.2 ± 0.02 |
| Cellobiose | 0.8 ± 0.03     | 0.7 ± 0.1  | 0.4 ± 0.02  | 0.1 ± 0.002 | 0.7 ± 0.2      | 0.5 ± 0.1  | 0.1 ± 0.01  | 0.1 ± 0.01 |
| Galactose  | 0.7 ± 0.1      | 0.6 ± 0.1  | 0.6 ± 0.1   | 0.8 ± 0.1   | 0.6 ± 0.1      | 1.3 ± 0.5  | 0.5 ± 0.03  | 0.5 ± 0.1  |
| Maltose    | 3.5 ± 0.2      | 4.0 ± 1.1  | 2.8 ± 0.2   | 0.7 ± 0.1   | 4.2 ± 0.6      | 3.3 ± 0.3  | 0.8 ± 0.1   | 1.3 ± 0.1  |
| Sucrose    | 26.6 ± 0.1     | 5.6 ± 1.0  | 4.5 ± 0.3   | 0.6 ± 0.02  | 8.0 ± 1.0      | 2.7 ± 0.1  | 0.6 ± 0.1   | 1.1 ± 0.1  |
| Glucose    | 34.6 ± 0.2     | 36.1 ± 9.3 | 20.8 ± 2.2  | 3.8 ± 0.5   | 27.4 ± 0.4     | 14.6 ± 1.0 | 1.9 ± 0.1   | 4.0 ± 0.2  |

**Table S9** Values for **Figure 12**. Organic acids in spruce bark water extract (amount, mg/g of dry bark)

| Compounds     | Winter Storage |            |            |             | Summer Storage |            |              |              |
|---------------|----------------|------------|------------|-------------|----------------|------------|--------------|--------------|
|               | zero-sample    | 4 weeks    | 12 weeks   | 24 weeks    | zero-sample    | 4 weeks    | 12 weeks     | 24 weeks     |
| Other         | 0.8 ± 0.5      | 0.0        | 0.0        | 0.1 ± 0.002 | 0.6 ± 0.1      | 0.4 ± 0.1  | 0.2 ± 0.1    | 0.5 ± 0.02   |
| Shikmic Acid  | 0.4 ± 0.1      | 1.0 ± 0.2  | 0.3 ± 0.02 | 0.1 ± 0.01  | 0.3 ± 0.02     | 0.2 ± 0.01 | 0.1 ± 0.0003 | 0.1 ± 0.01   |
| Malic Acid    | 1.4 ± 0.04     | 0.6 ± 0.2  | 0.7 ± 0.03 | 0.1 ± 0.01  | 1.0 ± 0.1      | 0.4 ± 0.1  | 0.0 ± 0.01   | 0.1 ± 0.0004 |
| Quinic Acid   | 5.3 ± 0.8      | 4.1 ± 1.0  | 3.5 ± 0.2  | 0.3 ± 0.04  | 5.6 ± 0.4      | 2.9 ± 0.1  | 0.3 ± 0.02   | 0.3 ± 0.03   |
| Aconitic Acid | 4.8 ± 0.4      | 5.4 ± 2.0  | 5.4 ± 0.1  | 0.6 ± 0.1   | 6.2 ± 0.9      | 3.9 ± 0.7  | 0.3 ± 0.01   | 0.4 ± 0.0002 |
| Gluconic Acid | 11.0 ± 0.1     | 11.6 ± 2.4 | 7.8 ± 0.5  | 1.1 ± 0.1   | 10.6 ± 0.7     | 6.3 ± 0.7  | 1.1 ± 0.02   | 2.2 ± 0.01   |

**Table S10** Values for **Figure 13**. Stilbenes in spruce bark water extract (amount, mg/g of dry bark)

| Compounds | Winter Storage |         |          |          | Summer Storage |         |          |          |
|-----------|----------------|---------|----------|----------|----------------|---------|----------|----------|
|           | zero-          | 4 weeks | 12 weeks | 24 weeks | zero-          | 4 weeks | 12 weeks | 24 weeks |

|                 | sample      |           |             |            | sample     |              |             |            |
|-----------------|-------------|-----------|-------------|------------|------------|--------------|-------------|------------|
| Rhapontigenin   | 0.7 ± 0.03  | 0.6 ± 0.1 | 0.3 ± 0.03  | 0.4 ± 0.03 | 0.4 ± 0.1  | 0.7 ± 0.0004 | 0.3 ± 0.01  | 0.3 ± 0.03 |
| Cis-Piceatannol | 0.7 ± 0.02  | 0.9 ± 0.1 | 0.5 ± 0.004 | 0.3 ± 0.02 | 0.6 ± 0.1  | 0.5 ± 0.03   | 0.2 ± 0.04  | 0.2 ± 0.02 |
| Piceid          | 2.0 ± 0.01  | 2.8 ± 0.2 | 1.2 ± 0.02  | 0.3 ± 0.2  | 2.8 ± 0.5  | 1.7 ± 0.1    | 0.2 ± 0.003 | 0.1 ± 0.01 |
| Astringin       | 6.3 ± 0.1   | 3.5 ± 2.0 | 1.3 ± 0.2   | 0.1 ± 0.04 | 0.2 ± 0.01 | 0.6 ± 0.1    | 0.3 ± 0.1   | 0.0 ± 0.01 |
| Isorhapontin    | 13.8 ± 0.04 | 9.3 ± 1.1 | 2.8 ± 0.02  | 0.3 ± 0.1  | 6.0 ± 1.3  | 3.1 ± 0.1    | 0.4 ± 0.1   | 0.1 ± 0.02 |

**Table S11** Values for **Figure 14**. Alcohols in spruce bark water extract (amount, mg/g of dry bark)

| Compounds         | Winter Storage |            |            |             | Summer Storage |            |             |             |
|-------------------|----------------|------------|------------|-------------|----------------|------------|-------------|-------------|
|                   | zero-sample    | 4 weeks    | 12 weeks   | 24 weeks    | zero-sample    | 4 weeks    | 12 weeks    | 24 weeks    |
| Coniferin         | 0.6 ± 0.01     | 0.6 ± 0.2  | 0.3 ± 0.01 | 0.1 ± 0.01  | 0.6 ± 0.1      | 0.3 ± 0.02 | 0.0 ± 0.001 | 0.1 ± 0.01  |
| Mannitol          | 0.3 ± 0.01     | 0.3 ± 0.07 | 0.5 ± 0.01 | 0.7 ± 0.1   | 0.3 ± 0.03     | 0.5 ± 0.05 | 0.1 ± 0.004 | 0.5 ± 0.03  |
| Arabitol          | 0.4 ± 0.04     | 0.4 ± 0.1  | 0.3 ± 0.01 | 0.6 ± 0.1   | 0.2 ± 0.02     | 0.5 ± 0.04 | 0.4 ± 0.01  | 0.6 ± 0.03  |
| Inositol          | 0.5 ± 0.01     | 0.5 ± 0.1  | 0.6 ± 0.01 | 0.1 ± 0.02  | 1.0 ± 0.1      | 0.6 ± 0.04 | 0.1 ± 0.003 | 0.1 ± 0.002 |
| Maltitol          | 0.6 ± 0.01     | 0.8 ± 0.1  | 1.5 ± 0.1  | 0.2 ± 0.003 | 1.6 ± 0.2      | 1.1 ± 0.04 | 0.2 ± 0.01  | 0.2 ± 0.03  |
| Maltotriitol      | 1.7 ± 0.03     | 1.1 ± 0.2  | 1.1 ± 0.04 | 0.4 ± 0.02  | 1.1 ± 0.2      | 0.9 ± 0.05 | 0.2 ± 0.004 | 0.3 ± 0.04  |
| Guaiacyl Glycerol | 1.1 ± 0.1      | 1.2 ± 0.5  | 1.2 ± 0.1  | 0.4 ± 0.1   | 1.7 ± 0.2      | 1.2 ± 0.1  | 0.4 ± 0.02  | 0.2 ± 0.1   |
| Salicin           | 1.9 ± 0.1      | 1.9 ± 0.6  | 1.8 ± 0.01 | 0.1 ± 0.02  | 1.5 ± 0.2      | 0.6 ± 0.02 | 0.3 ± 0.01  | 0.2 ± 0.01  |
| Pinitol           | 4.0 ± 0.02     | 3.9 ± 0.9  | 2.6 ± 0.02 | 0.6 ± 0.1   | 4.6 ± 0.4      | 2.5 ± 0.2  | 0.3 ± 0.01  | 0.2 ± 0.01  |

**Table S12** Values for **Figure 15**. Flavonoids in spruce bark water extract (amount, mg/g of dry bark)

| Compounds           | Winter Storage |            |            |             | Summer Storage |            |             |             |
|---------------------|----------------|------------|------------|-------------|----------------|------------|-------------|-------------|
|                     | zero-sample    | 4 weeks    | 12 weeks   | 24 weeks    | zero-sample    | 4 weeks    | 12 weeks    | 24 weeks    |
| Ampelopsin          | 0.5 ± 0.1      | 0.2 ± 0.01 | 0.0        | 0.2 ± 0.002 | 1.0 ± 0.1      | 0.8 ± 0.1  | 0.2 ± 0.02  | 0.2 ± 0.04  |
| Naringin            | 1.0 ± 0.1      | 0.9 ± 0.4  | 0.8 ± 0.02 | 0.1 ± 0.004 | 1.3 ± 0.3      | 0.5 ± 0.02 | 0.3 ± 0.03  | 0.1 ± 0.01  |
| Catechin            | 1.0 ± 0.3      | 1.2 ± 0.3  | 0.5 ± 0.03 | 0.3 ± 0.004 | 0.8 ± 0.1      | 0.7 ± 0.1  | 0.3 ± 0.01  | 0.4 ± 0.04  |
| Taxifolin           | 1.1 ± 0.02     | 0.9 ± 0.2  | 0.7 ± 0.1  | 0.2 ± 0.002 | 0.4 ± 0.1      | 0.7 ± 0.03 | 0.4 ± 0.001 | 0.7 ± 0.1   |
| Taxifolin Glycoside | 1.0 ± 0.1      | 1.8 ± 0.6  | 1.3 ± 0.01 | 0.1 ± 0.01  | 1.6 ± 0.2      | 0.5 ± 0.02 | 0.1 ± 0.003 | 0.1 ± 0.004 |

**Table S13** Values for **Figure 16**. Monosaccharides in extractives-free bark (amount, % of dry matter)

| Compounds | Winter Storage |             | Summer Storage |            |
|-----------|----------------|-------------|----------------|------------|
|           | zero-sample    | 24 weeks    | zero-sample    | 24 weeks   |
| Galactose | 2.8 ± 0.2      | 2.4 ± 0.1   | 1.8 ± 0.2      | 2.6 ± 0.2  |
| Xylose    | 3.0 ± 0.2      | 4.0 ± 0.1   | 2.5 ± 0.3      | 3.7 ± 0.3  |
| Mannose   | 3.8 ± 0.3      | 3.3 ± 0.1   | 1.4 ± 0.2      | 2.6 ± 0.2  |
| Arabinose | 6.5 ± 0.5      | 5.4 ± 0.1   | 6.2 ± 0.7      | 5.7 ± 0.4  |
| Glucose   | 35.8 ± 4.2     | 32.7 ± 0.03 | 33.0 ± 1.7     | 29.1 ± 2.0 |

**Table S14** Values for **Figure 17**. Hemicelluloses in extractives-free bark (amount, % of dry matter)

| Compounds | Winter Storage |         |          |          | Summer Storage |         |          |          |
|-----------|----------------|---------|----------|----------|----------------|---------|----------|----------|
|           | zero-          | 4 weeks | 12 weeks | 24 weeks | zero-          | 4 weeks | 12 weeks | 24 weeks |

|                   | sample        |               |                |               | sample         |               |               |                |
|-------------------|---------------|---------------|----------------|---------------|----------------|---------------|---------------|----------------|
| Glucuronic Acid   | $0.3 \pm 0.1$ | $0.3 \pm 0.1$ | $0.3 \pm 0.04$ | $0.6 \pm 0.2$ | $0.2 \pm 0.02$ | $0.9 \pm 0.5$ | $1.6 \pm 0.5$ | $1.4 \pm 0.1$  |
| Rhamnose          | $0.7 \pm 0.1$ | $1.1 \pm 0.1$ | $0.8 \pm 0.1$  | $1.0 \pm 0.1$ | $0.6 \pm 0.02$ | $1.1 \pm 0.3$ | $1.1 \pm 0.2$ | $1.0 \pm 0.04$ |
| Mannose           | $2.4 \pm 0.4$ | $1.7 \pm 0.4$ | $2.1 \pm 0.3$  | $2.8 \pm 0.4$ | $0.7 \pm 0.2$  | $2.5 \pm 0.2$ | $2.0 \pm 0.1$ | $2.7 \pm 0.1$  |
| Galactose         | $3.1 \pm 0.2$ | $3.6 \pm 0.4$ | $3.0 \pm 0.3$  | $3.8 \pm 0.4$ | $1.8 \pm 0.3$  | $3.6 \pm 0.6$ | $3.7 \pm 0.5$ | $4.2 \pm 0.2$  |
| Xylose            | $3.9 \pm 0.4$ | $3.7 \pm 0.8$ | $3.5 \pm 0.2$  | $4.6 \pm 0.3$ | $1.9 \pm 0.4$  | $4.5 \pm 1.0$ | $3.8 \pm 0.4$ | $4.5 \pm 0.5$  |
| Galacturonic Acid | $6.7 \pm 0.8$ | $8.2 \pm 0.4$ | $5.7 \pm 0.6$  | $7.3 \pm 1.0$ | $3.9 \pm 0.3$  | $8.2 \pm 1.1$ | $8.9 \pm 1.0$ | $8.1 \pm 1.2$  |
| Arabinose         | $6.3 \pm 0.3$ | $8.9 \pm 1.1$ | $6.1 \pm 1.0$  | $7.5 \pm 1.0$ | $4.9 \pm 0.4$  | $7.9 \pm 1.2$ | $8.2 \pm 1.9$ | $7.2 \pm 0.6$  |
| Glucose           | $2.7 \pm 0.1$ | $3.3 \pm 0.4$ | $6.3 \pm 0.7$  | $5.6 \pm 0.5$ | $8.9 \pm 0.8$  | $5.6 \pm 0.2$ | $7.3 \pm 1.4$ | $7.3 \pm 0.6$  |

**Table S15** Values for **Figure 18**. Total phenolic content (TPC) of water extracts

| Compounds                   | Winter Storage  |                 |                 |                | Summer Storage  |                |                |                |
|-----------------------------|-----------------|-----------------|-----------------|----------------|-----------------|----------------|----------------|----------------|
|                             | zero-sample     | 4 weeks         | 12 weeks        | 24 weeks       | zero-sample     | 4 weeks        | 12 weeks       | 24 weeks       |
| TPC                         | $111.0 \pm 1.2$ | $131.8 \pm 9.1$ | $112.9 \pm 6.5$ | $76.8 \pm 5.2$ | $89.4 \pm 19.7$ | $94.9 \pm 1.7$ | $74.7 \pm 1.0$ | $46.9 \pm 0.6$ |
| Unidentified (non-phenolic) | 72.8            | 95.1            | 88.4            | 67.1           | 60.7            | 70.0           | 62.6           | 39.3           |
| Unidentified (polyphenols)  | 68.1            | 64.1            | 109.9           | 69.7           | 94.9            | 88.0           | 80.8           | 29.4           |
